# Supplementary material for: Data-driven analysis of a mechanistic model of CAR T cell signaling predicts effects of cell-to-cell heterogeneity
Source: PubMed Central journal article supplement — J Theor Biol. Author manuscript; Available in PMC 2020 Sep 3. (PMC7467855; doi:10.1016/j.jtbi.2019.110125), 2019-12-19
Supplement: NIHMS1621113-supplement-Supplementary_Material.pdf [file NIHMS1621113-supplement-Supplementary_Material.pdf]

# Data-Driven Analysis of a Mechanistic Model of CAR T Cell Signaling Predicts Effects of Cell-to-cell Heterogeneity

Colin G. Cess<sup>1</sup> and Stacey D. Finley<sup>1,2,3\*</sup>

<sup>1</sup>Department of Biomedical Engineering, University of Southern California, Los Angeles, CA

<sup>2</sup>Mork Family Department of Chemical Engineering and Materials Science, University of Southern California, Los Angeles, CA

<sup>3</sup>Department of Biological Sciences, University of Southern California, Los Angeles, CA

## Supplementary Figures

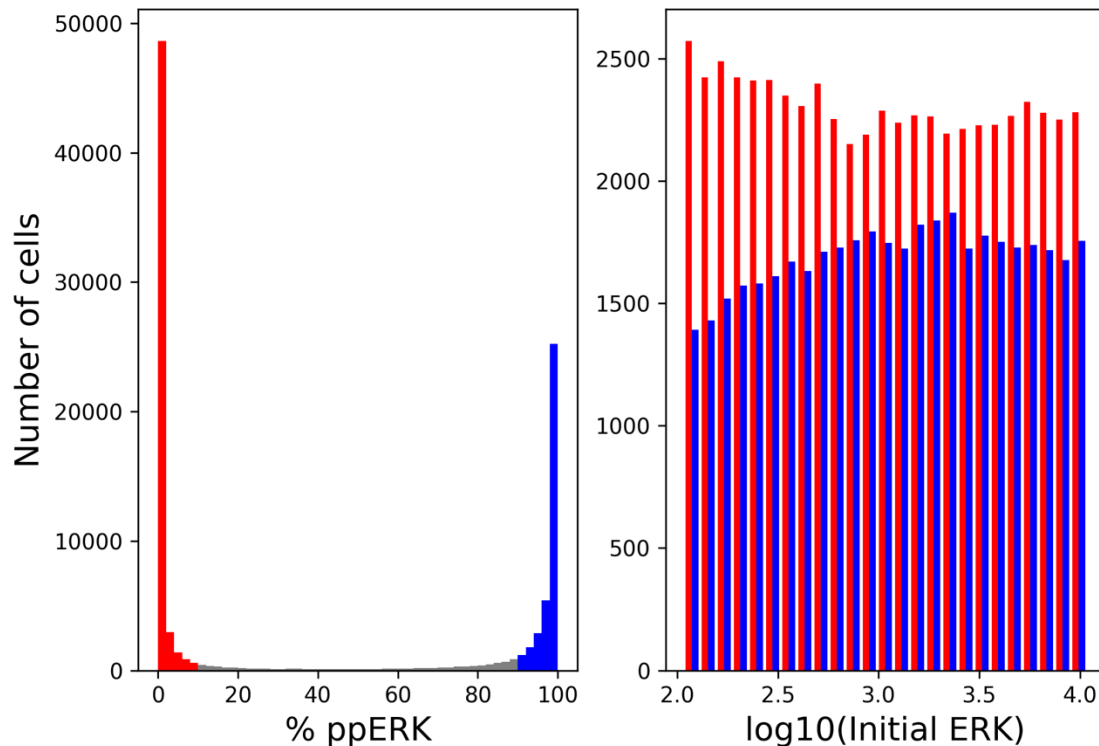

**Figure S1:** (A) Histogram of the final relative concentrations of phosphorylated ERK. Concentrations below 10% are shown in red, above 90% in blue, and in between in gray. (B) Histogram showing distributions of initial ERK concentrations that led to a response (blue) and no response (red). The significant overlap between the two distributions indicates that initial ERK concentration is not sufficient to separate high and low ERK response.

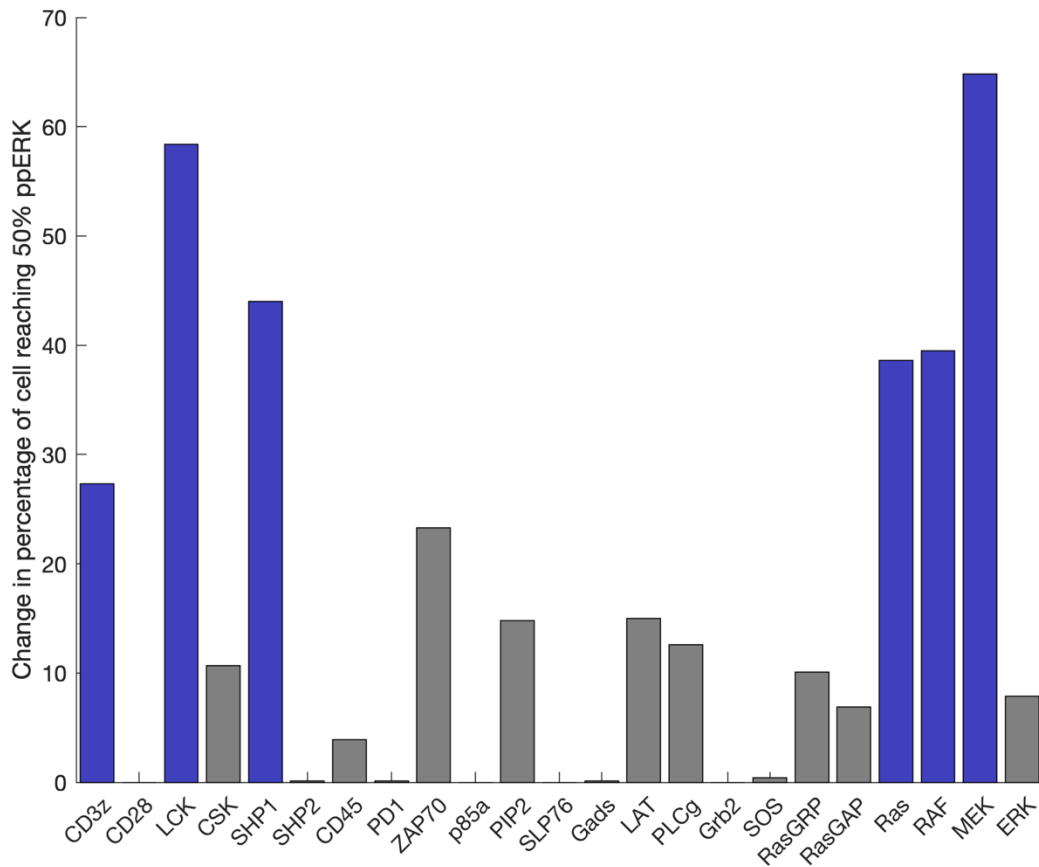

**Figure S2:** Absolute difference in percent of high ERK responders in a population of 1,000 simulated cells for high initial concentration (10 times the baseline value) compared to low initial concentration (0.1 times the baseline value) of each protein. Blue bars indicate proteins that were identified as influential by the PLS model.
